# Supplementary material for: Optimization of polysaccharide conditions and analysis of antioxidant capacity in the co-culture of Sanghuangporus vaninii and Pleurotus sapidus
Source: PeerJ. 2024 Jun 24;12:e17571. doi: 10.7717/peerj.17571 (PMC11210461; doi:10.7717/peerj.17571)
Supplement: Supplemental Information 1 — Note: Combinations 1-10 are ST and BLZ co-culture, combination 11 is BLZ single culture, and combination 12 is ST single culture. [file peerj-12-17571-s001.xlsx]

## Sheet: Sheet1
	Combination	ST seed pre-culture liquid culture time (d)	BLZ seed pre-culture liquid culture time (d)
	1	0	0
	2	1	1
	3	2	2
	4	3	3
	5	1	0
	6	2	1
	7	3	2
	8	2	0
	9	3	1
	10	3	0
	11	-	7
	12	7	-
