# Supplementary material for: Optimization of polysaccharide conditions and analysis of antioxidant capacity in the co-culture of Sanghuangporus vaninii and Pleurotus sapidus
Source: PeerJ. 2024 Jun 24;12:e17571. doi: 10.7717/peerj.17571 (PMC11210461; doi:10.7717/peerj.17571)
Supplement: Supplemental Information 2 [file peerj-12-17571-s002.xlsx]

## Sheet: Sheet1
	Variables			Levels
	Factor	Name	Unit	-1	+1
	X1	Glucose concentration	g/L	24	30
	X2	Yeast extract concentration	g/L	6.4	8
	X3	KH2PO4 concentration	g/L	0.8	1
	X4	MgSO4·7H2O concentration	g/L	1.6	2
	X5	Initial pH	-	7.2	9
	X6	Liquid loading volume	mL	80	100
	X7	Inoculation volume	%	8	10
	X8	ST inoculum ratio	%	56	70
