# Supplementary material for: Optimization of polysaccharide conditions and analysis of antioxidant capacity in the co-culture of Sanghuangporus vaninii and Pleurotus sapidus
Source: PeerJ. 2024 Jun 24;12:e17571. doi: 10.7717/peerj.17571 (PMC11210461; doi:10.7717/peerj.17571)
Supplement: Supplemental Information 3 [file peerj-12-17571-s003.xlsx]

## Sheet: Sheet1
	Variables			Levels
	Factor	Name	Unit	-1	0	+1
	A	Yeast extract concentration	g/L	5	8	11
	B	ST inoculum ratio	%	60	70	80
	C	Liquid loading volume	mL	75	100	125
