# Supplementary material for: Optimization of polysaccharide conditions and analysis of antioxidant capacity in the co-culture of Sanghuangporus vaninii and Pleurotus sapidus
Source: PeerJ. 2024 Jun 24;12:e17571. doi: 10.7717/peerj.17571 (PMC11210461; doi:10.7717/peerj.17571)
Supplement: Supplemental Information 4 — Note: Different letters indicate significant differences in means (p < 0.05). [file peerj-12-17571-s004.xlsx]

## Sheet: Sheet1
	NO.	Test strains	Biomass (g/100mL)	IPS content (mg/g)
	1	ST	0.5775 ± 0.0150 ef	12.7286 ± 0.3774 k
	2	BPCJ+ST	0.5377 ± 0.0165 g	21.3047 ± 0.6351 h
	3	BPCJ	0.5640 ± 0.0112 fg	20.1241 ± 0.6093 i
	4	P8+ST	0.8174 ± 0.0251 c	23.1432 ± 0.4273 fg
	5	P8	0.8174 ± 0.0176 c	25.1078 ± 0.6944 d
	6	HT3+ST	0.4223 ± 0.0093 h	24.5098 ± 0.1535 de
	7	HT3	0.3406 ± 0.0102 i	23.7068 ± 0.5603 ef
	8	DM+ST	0.6848 ± 0.0171 d	13.3412 ± 0.3346 k
	9	DM	0.5987 ± 0.0148 e	15.7817 ± 0.2976 j
	10	BJZ+ST	0.4367 ± 0.0083 h	16.3433 ± 0.4364 j
	11	BJZ	0.7005 ± 0.0238 d	22.7538 ± 0.5149 g
	12	XG+ST	0.0420 ± 0.0051 j	20.1931 ± 0.3185 i
	13	XG	0.0503 ± 0.0063 j	27.1388 ± 0.6252 c
	14	BLZ+ST	0.9215 ± 0.0322 a	59.8302 ± 0.8376 a
	15	BLZ	0.8729 ± 0.0181 b	53.7090 ± 0.8054 b
