# Supplementary material for: Optimization of polysaccharide conditions and analysis of antioxidant capacity in the co-culture of Sanghuangporus vaninii and Pleurotus sapidus
Source: PeerJ. 2024 Jun 24;12:e17571. doi: 10.7717/peerj.17571 (PMC11210461; doi:10.7717/peerj.17571)
Supplement: Supplemental Information 5 [file peerj-12-17571-s005.xlsx]

## Sheet: Sheet1
	Run.order	X1	X2	X3	X4	X5	X6	X7	X8	Response value
		Glucose concentration (g/L)	Yeast extract concentration (g/L)	KH2PO4 concentration (g/L)	MgSO4·7H2O concentration (g/L)	Initial pH	Liquid loading volume (mL)	Inoculation volume (%)	ST inoculum ratio (%)	Polysaccharide content (mg/g)
	1	30	8	0.8	1.6	9	100	8	56	52.9959
	2	24	6.4	1	1.6	9	100	8	70	44.951
	3	24	8	0.8	2	7.2	100	10	70	58.0327
	4	30	6.4	0.8	1.6	7.2	100	10	70	64.0629
	5	30	6.4	1	2	7.2	80	8	70	52.0004
	6	24	6.4	0.8	1.6	7.2	80	8	56	58.4561
	7	24	8	1	1.6	9	80	10	70	29.622
	8	30	8	0.8	2	9	80	8	70	33.7195
	9	30	6.4	1	2	9	100	10	56	64.1685
	10	24	6.4	0.8	2	9	80	10	56	59.6148
	11	30	8	1	1.6	7.2	80	10	56	43.6575
	12	24	8	1	2	7.2	100	8	56	48.8338
