# Supplementary material for: Optimization of polysaccharide conditions and analysis of antioxidant capacity in the co-culture of Sanghuangporus vaninii and Pleurotus sapidus
Source: PeerJ. 2024 Jun 24;12:e17571. doi: 10.7717/peerj.17571 (PMC11210461; doi:10.7717/peerj.17571)
Supplement: Supplemental Information 6 — Note: *, p＜0.05. [file peerj-12-17571-s006.xlsx]

## Sheet: Sheet1
	Source		Sum of Squares	F-value	p-value
	Model		1329.81	10.17	0.0413*
	X1	Glucose concentration	10.26	0.63	0.4861
	X2	Yeast extract concentration	486.32	29.76	0.0121*
	X3	KH2PO4 concentration	158.77	9.72	0.0526
	X4	MgSO4·7H2O concentration	42.65	2.61	0.2046
	X5	Initial pH	133.14	8.15	0.0649
	X6	Liquid loading volume	261.1	15.98	0.0281*
	X7	Inoculation volume	66.28	4.06	0.1375
	X8	ST inoculum ratio	171.3	10.48	0.0479*
	R2		-	0.9644	-
	Adj R2		-	0.8696	-
