# Supplementary material for: Optimization of polysaccharide conditions and analysis of antioxidant capacity in the co-culture of Sanghuangporus vaninii and Pleurotus sapidus
Source: PeerJ. 2024 Jun 24;12:e17571. doi: 10.7717/peerj.17571 (PMC11210461; doi:10.7717/peerj.17571)
Supplement: Supplemental Information 7 [file peerj-12-17571-s007.xlsx]

## Sheet: Sheet1
	Run. order	Variables			Response value
		A: Yeast extract concentration (g/L)	B: ST inoculum ratio (%)	C: Liquid loading volume (mL)	Polysaccharide content (mg/g)
	1	5	70	125	61.6408
	2	5	80	100	60.8699
	3	11	70	125	34.7527
	4	8	70	100	66.7635
	5	8	60	125	47.3028
	6	11	60	100	50.6033
	7	8	70	100	65.7598
	8	8	80	125	56.9552
	9	8	70	100	65.7612
	10	8	70	100	66.5578
	11	8	70	100	65.2032
	12	11	70	75	32.7527
	13	5	60	100	66.1607
	14	11	80	100	43.0082
	15	8	60	75	51.5302
	16	8	80	75	34.3047
	17	5	70	75	42.7653
