# Supplementary material for: Optimization of polysaccharide conditions and analysis of antioxidant capacity in the co-culture of Sanghuangporus vaninii and Pleurotus sapidus
Source: PeerJ. 2024 Jun 24;12:e17571. doi: 10.7717/peerj.17571 (PMC11210461; doi:10.7717/peerj.17571)
Supplement: Supplemental Information 8 — Note: **, p＜0.01. [file peerj-12-17571-s008.xlsx]

## Sheet: Sheet1
	Source	Sum of Squares	df	Mean Square	F-value	p-value
	Model	2495.17	9	277.24	260.9	< 0.0001**
	A: Yeast extract concentration	618.11	1	618.11	581.67	< 0.0001**
	B: ST inoculum ratio	52.32	1	52.32	49.24	0.0002**
	C: Liquid loading volume	193.05	1	193.05	181.67	< 0.0001**
	AB	1.33	1	1.33	1.25	0.3006
	AC	71.2	1	71.2	67	< 0.0001
	BC	180.61	1	180.61	169.96	< 0.0001
	A2	249.45	1	249.45	234.74	< 0.0001
	B2	41.82	1	41.82	39.36	0.0004
	C2	990.06	1	990.06	931.7	< 0.0001
	Residual	7.44	7	1.06
	Lack of Fit	5.8	3	1.93	4.7	0.0845
	Pure Error	1.64	4	0.41
	Cor Total	2502.61	16
	R2				0.997
	Adj R2				0.9932
