# Supplementary material for: Optimization of polysaccharide conditions and analysis of antioxidant capacity in the co-culture of Sanghuangporus vaninii and Pleurotus sapidus
Source: PeerJ. 2024 Jun 24;12:e17571. doi: 10.7717/peerj.17571 (PMC11210461; doi:10.7717/peerj.17571)
Supplement: Supplemental Information 9 [file peerj-12-17571-s009.xlsx]

## Sheet: Sheet1
	Indicator	Unoptimized	Optimized	Optimized to increase the percentage
	Biomass (g/100mL)	0.7651 ± 0.0069	0.7628 ±0.0381	-0.003
	IPS content (mg/g)	59.7789 ± 0.3635	69.9626 ± 2.1491	0.1704
