# Supplementary material for: Optimization of polysaccharide conditions and analysis of antioxidant capacity in the co-culture of Sanghuangporus vaninii and Pleurotus sapidus
Source: PeerJ. 2024 Jun 24;12:e17571. doi: 10.7717/peerj.17571 (PMC11210461; doi:10.7717/peerj.17571)
Supplement: Supplemental Information 10 [file peerj-12-17571-s010.xlsx]

## Sheet: Biomass
	Test No.		Petri dish weight(g)	Total weight(g)	Biomass (g/100mL)
	1	1-1	36.818	37.7575	0.9395
		1-2	38.6429	39.5754	0.9325
		1-3	40.1042	41.0504	0.9462
	2	2-1	30.7095	31.631	0.9215
		2-2	35.0248	35.938	0.9132
		2-3	32.4015	33.3317	0.9302
	3	3-1	41.5249	42.2504	0.7255
		3-2	31.9801	32.7002	0.7201
		3-3	40.0017	40.7325	0.7308
	4	4-1	38.7291	38.9645	0.2354
		4-2	32.9934	33.223	0.2296
		4-3	45.1103	45.3515	0.2412
	5	5-1	28.6807	29.5451	0.8644
		5-2	33.5318	34.3896	0.8578
		5-3	32.2014	33.0725	0.8711
	6	6-1	29.4735	30.2503	0.7768
		6-2	26.2305	26.9987	0.7682
		6-3	32.9481	33.7333	0.7852
	7	7-1	29.8582	30.3721	0.5139
		7-2	38.2691	38.7759	0.5068
		7-3	33.0078	33.529	0.5212
	8	8-1	33.1632	33.9283	0.7651
		8-2	34.3321	35.0903	0.7582
		8-3	36.1901	36.962	0.7719
	9	9-1	45.0093	45.3466	0.3373
	9	9-2	42.1142	42.4469	0.3327
		9-3	37.8846	38.2264	0.3418
	10	10-1	36.2501	36.5268	0.2767
	10	10-2	40.7319	41.0037	0.2718
		10-3	39.5526	39.8342	0.2816
	11	11-1	44.1371	45.0253	0.8882
		11-2	29.0621	29.9402	0.8781
		11-3	33.2774	34.1757	0.8983
	12	12-1	42.5835	43.2166	0.6331
		12-2	45.1159	45.7447	0.6288
		12-3	39.7725	40.41	0.6375

## Sheet: Polysaccharide content
	Test No.		Sample weights(g)	OD	Mass(mg)	Polysaccharide content (mg/g)
	1	1-1	0.0513	1.507	3.04821	59.4193
		1-2	0.0506	1.477	2.9893	59.077
		1-3	0.051	1.505	3.04428	59.6918
	2	2-1	0.0505	1.036	2.12332	42.0459
		2-2	0.0509	1.054	2.15866	42.4099
		2-3	0.0501	1.046	2.14296	42.7736
	3	3-1	0.0515	0.401	0.876387	17.0172
		3-2	0.0512	0.411	0.896024	17.5005
		3-3	0.0509	0.414	0.901915	17.7193
	4	4-1	0.0512	0.357	0.789985	15.4294
		4-2	0.0507	0.361	0.79784	15.7365
		4-3	0.0511	0.373	0.821404	16.0744
	5	5-1	0.0504	1.174	2.39431	47.5061
		5-2	0.0502	1.182	2.41001	48.0083
		5-3	0.05	1.183	2.41198	48.2396
	6	6-1	0.0509	0.754	1.56956	30.8362
		6-2	0.0505	0.755	1.57153	31.1193
		6-3	0.0506	0.763	1.58724	31.3683
	7	7-1	0.0511	0.711	1.48513	29.0631
		7-2	0.0519	0.735	1.53225	29.5232
		7-3	0.0513	0.736	1.53422	29.9068
	8	8-1	0.0511	1.502	3.03839	59.4597
		8-2	0.0506	1.493	3.02072	59.698
		8-3	0.0502	1.493	3.02072	60.1736
	9	9-1	0.0505	0.662	1.38891	27.5031
		9-2	0.05	0.667	1.39872	27.9745
		9-3	0.0502	0.681	1.42622	28.4107
	10	10-1	0.0516	0.503	1.07668	20.8659
		10-2	0.0511	0.503	1.07668	21.0701
		10-3	0.0505	0.5	1.07079	21.2038
	11	11-1	0.0508	1.284	2.61031	51.384
		11-2	0.05	1.278	2.59853	51.9705
		11-3	0.0502	1.296	2.63387	52.4676
	12	12-1	0.0498	0.266	0.611291	12.2749
		12-2	0.05	0.279	0.636819	12.7364
		12-3	0.0502	0.296	0.670201	13.3506
