# Supplementary material for: Optimization of polysaccharide conditions and analysis of antioxidant capacity in the co-culture of Sanghuangporus vaninii and Pleurotus sapidus
Source: PeerJ. 2024 Jun 24;12:e17571. doi: 10.7717/peerj.17571 (PMC11210461; doi:10.7717/peerj.17571)
Supplement: Supplemental Information 11 [file peerj-12-17571-s011.xlsx]

## Sheet: Biomass
	Test No.		Petri dish weight(g)	Total weight(g)	Biomass (g/100mL)
	10g/L	1-1	40.5474	41.2085	0.6611
		1-2	37.0326	37.6826	0.65
		1-3	35.0442	35.7142	0.67
	20g/L	2-1	39.8949	40.657	0.7621
		2-2	41.4423	42.1945	0.7522
		2-3	35.931	36.703	0.772
	30g/L	3-1	41.9604	42.7727	0.8123
		3-2	45.2812	46.0862	0.805
		3-3	39.0362	39.8562	0.82
	40g/L	4-1	32.7731	33.6251	0.852
		4-2	40.5474	41.3864	0.839
		4-3	41.6282	42.4982	0.87
	50g/L	5-1	33.4143	34.344	0.9297
		5-2	40.5474	41.4671	0.9197
		5-3	36.0032	36.9429	0.9397
	60g/L	6-1	40.3215	41.2886	0.9671
		6-2	32.9921	33.9521	0.96
		6-3	37.3387	38.3137	0.975
	70g/L	7-1	42.1175	43.1406	1.0231
		7-2	46.9932	47.9832	0.99
		7-3	45.6291	46.7091	1.08

## Sheet: Polysaccharide content
	Test No.		Sample weights(g)	OD	Mass(mg)	Polysaccharide content (mg/g)
	10g/L	1-1	0.05	1.37	2.77919	55.5837
		1-2	0.05	1.36	2.75955	55.191
		1-3	0.05	1.382	2.80275	56.055
	20g/L	2-1	0.0502	1.391	2.82042	56.1837
		2-2	0.05	1.372	2.78311	55.6622
		2-3	0.0498	1.395	2.82828	56.7927
	30g/L	3-1	0.0498	1.424	2.88522	57.9362
		3-2	0.05	1.42	2.87737	57.5474
		3-3	0.0501	1.446	2.92842	58.4516
	40g/L	4-1	0.0509	1.354	2.74777	53.9836
		4-2	0.0502	1.321	2.68297	53.4455
		4-3	0.0504	1.357	2.75366	54.6361
	50g/L	5-1	0.0504	1.293	2.62798	52.1425
		5-2	0.0501	1.26	2.56318	51.1613
		5-3	0.0502	1.304	2.64958	52.7805
	60g/L	6-1	0.0504	1.181	2.40805	47.7788
		6-2	0.0501	1.158	2.36289	47.1634
		6-3	0.0499	1.184	2.41394	48.3756
	70g/L	7-1	0.0503	1.088	2.22543	44.2431
		7-2	0.05	1.074	2.19794	43.9588
		7-3	0.0501	1.095	2.23918	44.6941
