# Supplementary material for: Optimization of polysaccharide conditions and analysis of antioxidant capacity in the co-culture of Sanghuangporus vaninii and Pleurotus sapidus
Source: PeerJ. 2024 Jun 24;12:e17571. doi: 10.7717/peerj.17571 (PMC11210461; doi:10.7717/peerj.17571)
Supplement: Supplemental Information 12 [file peerj-12-17571-s012.xlsx]

## Sheet: Biomass
	Test No.		Petri dish weight(g)	Total weight(g)	Biomass (g/100mL)
	2g/L	1-1	39.8762	40.2102	0.334
		1-2	36.3279	36.6479	0.32
		1-3	41.0633	41.4113	0.348
	5g/L	2-1	40.0841	40.9102	0.8261
		2-2	43.8137	44.6237	0.81
		2-3	41.5529	42.3951	0.8422
	8g/L	3-1	36.6207	37.7227	1.102
		3-2	38.6481	39.6581	1.01
		3-3	32.7728	33.9632	1.1904
	11g/L	4-1	43.2319	44.26	1.0281
		4-2	41.0073	42.0073	1
		4-3	37.7729	38.8329	1.06
	14g/L	5-1	47.6755	48.6564	0.9809
		5-2	44.9261	45.8961	0.97
		5-3	45.0481	46.0381	0.99
	17g/L	6-1	42.312	43.4013	1.0893
		6-2	33.0716	34.1224	1.0508
		6-3	40.7821	41.9301	1.148
	20g/L	7-1	42.7697	43.7403	0.9706
		7-2	41.9026	42.8626	0.96
		7-3	38.5529	39.5349	0.982

## Sheet: Polysaccharide content
	Test No.		Sample weights(g)	OD	Mass(mg)	Polysaccharide content (mg/g)
	2g/L	1-1	0.0508	0.624	1.31429	25.8718
		1-2	0.0506	0.604	1.27501	25.1979
		1-3	0.0502	0.631	1.32803	26.4548
	5g/L	2-1	0.0506	1.458	2.95199	58.3397
		2-2	0.0502	1.434	2.90486	57.8657
		2-3	0.05	1.454	2.94413	58.8827
	8g/L	3-1	0.0508	1.491	3.01679	59.3856
		3-2	0.0505	1.471	2.97752	58.9607
		3-3	0.051	1.511	3.05606	59.9228
	11g/L	4-1	0.0507	1.273	2.58871	51.0593
		4-2	0.05	1.241	2.52587	50.5174
		4-3	0.0502	1.268	2.57889	51.3723
	14g/L	5-1	0.0501	0.841	1.7404	34.7386
		5-2	0.05	0.828	1.71487	34.2975
		5-3	0.0502	0.852	1.762	35.0997
	17g/L	6-1	0.0499	0.846	1.75022	35.0746
		6-2	0.05	0.837	1.73255	34.651
		6-3	0.0503	0.867	1.79146	35.6155
	20g/L	7-1	0.0502	0.747	1.55582	30.9924
		7-2	0.0501	0.732	1.52636	30.4663
		7-3	0.0502	0.762	1.58527	31.5791
