# Supplementary material for: Optimization of polysaccharide conditions and analysis of antioxidant capacity in the co-culture of Sanghuangporus vaninii and Pleurotus sapidus
Source: PeerJ. 2024 Jun 24;12:e17571. doi: 10.7717/peerj.17571 (PMC11210461; doi:10.7717/peerj.17571)
Supplement: Supplemental Information 13 [file peerj-12-17571-s013.xlsx]

## Sheet: Biomass
	Test No.		Petri dish weight(g)	Total weight(g)	Biomass (g/100mL)
	0.2g/L	1-1	31.9844	32.7303	0.7459
		1-2	33.6021	34.338	0.7359
		1-3	40.0471	40.803	0.7559
	0.5g/L	2-1	40.2509	41.0321	0.7812
		2-2	29.9941	30.7653	0.7712
		2-3	32.5822	33.3734	0.7912
	1.0g/L	3-1	39.2181	40.0014	0.7833
		3-2	36.7411	37.5211	0.78
		3-3	29.9902	30.7768	0.7866
	1.5g/L	4-1	37.0557	37.8685	0.8128
		4-2	35.6692	36.474	0.8048
		4-3	39.0032	39.824	0.8208
	2.0g/L	5-1	27.2773	28.0868	0.8095
		5-2	29.6693	30.4693	0.8
		5-3	32.0306	32.8496	0.819
	2.5g/L	6-1	32.8779	33.7225	0.8446
		6-2	37.5281	38.3681	0.84
		6-3	39.0372	39.8664	0.8292
	3.0g/L	7-1	32.9681	33.7998	0.8317
		7-2	35.8416	36.6633	0.8217
		7-3	43.8319	44.6736	0.8417

## Sheet: Polysaccharide content
	Test No.		Sample weights(g)	OD	Mass(mg)	Polysaccharide content (mg/g)
	0.2g/L	1-1	0.0505	1.327	2.69475	53.3613
		1-2	0.0502	1.309	2.6594	52.9761
		1-3	0.0503	1.334	2.70849	53.8468
	0.5g/L	2-1	0.0511	1.457	2.95002	57.7304
		2-2	0.0505	1.43	2.89701	57.3664
		2-3	0.0502	1.438	2.91271	58.0222
	1.0g/L	3-1	0.0512	1.472	2.97948	58.193
		3-2	0.0507	1.447	2.93039	57.7986
		3-3	0.0503	1.455	2.9461	58.5705
	1.5g/L	4-1	0.0512	1.507	3.04821	59.5353
		4-2	0.051	1.488	3.0109	59.0372
		4-3	0.0508	1.507	3.04821	60.0041
	2.0g/L	5-1	0.0515	1.583	3.19745	62.0864
		5-2	0.0511	1.559	3.15032	61.6501
		5-3	0.0506	1.566	3.16406	62.5309
	2.5g/L	6-1	0.0519	1.589	3.20923	61.8349
		6-2	0.0517	1.571	3.17388	61.3904
		6-3	0.0512	1.577	3.18567	62.22
	3.0g/L	7-1	0.0511	1.42	2.87737	56.3086
		7-2	0.0507	1.399	2.83613	55.9395
		7-3	0.0505	1.414	2.86559	56.7443
