# Supplementary material for: Optimization of polysaccharide conditions and analysis of antioxidant capacity in the co-culture of Sanghuangporus vaninii and Pleurotus sapidus
Source: PeerJ. 2024 Jun 24;12:e17571. doi: 10.7717/peerj.17571 (PMC11210461; doi:10.7717/peerj.17571)
Supplement: Supplemental Information 14 [file peerj-12-17571-s014.xlsx]

## Sheet: Biomass
	Test No.		Petri dish weight(g)	Total weight(g)	Biomass (g/100mL)
	0.5g/L	1-1	36.6257	37.3906	0.7649
		1-2	29.7419	30.5179	0.776
		1-3	33.0724	33.8244	0.752
	1.0g/L	2-1	40.2154	40.9967	0.7813
		2-2	45.0019	45.7719	0.77
		2-3	36.7291	37.5217	0.7926
	1.5g/L	3-1	32.1352	32.9306	0.7954
		3-2	37.0481	37.8385	0.7904
		3-3	36.0073	36.8082	0.8009
	2.0g/L	4-1	37.2481	38.0423	0.7942
		4-2	39.9027	40.6866	0.7839
		4-3	35.8201	36.6283	0.8082
	2.5g/L	5-1	37.0121	37.7663	0.7542
		5-2	46.0813	46.8255	0.7442
		5-3	41.0371	41.8013	0.7642
	3.0g/L	6-1	43.3055	44.0751	0.7696
		6-2	38.9931	39.7727	0.7796
		6-3	41.5952	42.3548	0.7596
	3.5g/L	7-1	40.0896	40.8744	0.7848
		7-2	33.3382	34.1182	0.78
		7-3	37.8831	38.6727	0.7896

## Sheet: Polysaccharide content
	Test No.		Sample weights(g)	OD	Mass(mg)	Polysaccharide content (mg/g)
	0.5g/L	1-1	0.0516	1.434	2.90486	56.2957
		1-2	0.051	1.403	2.84399	55.7644
		1-3	0.0509	1.423	2.88326	56.6456
	1.0g/L	2-1	0.0502	1.422	2.8813	57.3963
		2-2	0.05	1.429	2.89504	57.9008
		2-3	0.0502	1.41	2.85773	56.9269
	1.5g/L	3-1	0.0501	1.424	2.88522	57.5893
		3-2	0.0501	1.44	2.91664	58.2164
		3-3	0.05	1.409	2.85577	57.1154
	2.0g/L	4-1	0.0498	1.364	2.7674	55.5703
		4-2	0.05	1.357	2.75366	55.0731
		4-3	0.0501	1.387	2.81257	56.1391
	2.5g/L	5-1	0.0511	1.352	2.74384	53.6955
		5-2	0.0513	1.365	2.76937	53.9838
		5-3	0.0508	1.335	2.71046	53.3554
	3.0g/L	6-1	0.0514	1.329	2.69867	52.5034
		6-2	0.051	1.309	2.6594	52.1451
		6-3	0.0517	1.348	2.73598	52.9204
	3.5g/L	7-1	0.0509	1.267	2.57693	50.6272
		7-2	0.0509	1.28	2.60245	51.1288
		7-3	0.0509	1.25	2.54354	49.9714
