# Supplementary material for: Optimization of polysaccharide conditions and analysis of antioxidant capacity in the co-culture of Sanghuangporus vaninii and Pleurotus sapidus
Source: PeerJ. 2024 Jun 24;12:e17571. doi: 10.7717/peerj.17571 (PMC11210461; doi:10.7717/peerj.17571)
Supplement: Supplemental Information 15 [file peerj-12-17571-s015.xlsx]

## Sheet: Biomass
	Test No.		Petri dish weight(g)	Total weight(g)	Biomass (g/100mL)
	3	1-1	41.0138	41.1181	0.1043
		1-2	43.7319	43.8319	0.1
		1-3	44.0931	44.2017	0.1086
	4	2-1	42.3248	42.471	0.1462
		2-2	29.7731	29.9131	0.14
		2-3	37.9036	38.056	0.1524
	5	3-1	32.1405	32.7179	0.5774
		3-2	36.3372	36.9046	0.5674
		3-3	39.4291	40.0165	0.5874
	6	4-1	41.2817	42.0721	0.7904
		4-2	42.0815	42.8615	0.78
		4-3	46.0095	46.8103	0.8008
	7	5-1	46.9587	47.738	0.7793
		5-2	32.2273	32.9973	0.77
		5-3	39.0015	39.7901	0.7886
	8	6-1	38.7393	39.4825	0.7432
		6-2	35.8832	36.6132	0.73
		6-3	41.2748	42.0312	0.7564
	9	7-1	48.7159	49.4091	0.6932
		7-2	45.7123	46.3955	0.6832
		7-3	47.0931	47.7963	0.7032
	10	8-1	44.9738	45.522	0.5482
		8-2	46.8316	47.3716	0.54
		8-3	41.9947	42.5511	0.5564
	11	9-1	42.1746	42.6493	0.4747
		9-2	45.9316	46.4016	0.47
		9-3	43.9973	44.4767	0.4794

## Sheet: Polysaccharide content
	Test No.		Sample weights(g)	OD	Mass(mg)	Polysaccharide content (mg/g)
	3	1-1	0.0502	0.243	0.566127	11.2774
		1-2	0.0502	0.233	0.54649	10.8863
		1-3	0.05	0.252	0.5838	11.676
	4	2-1	0.0509	0.323	0.72322	14.2087
		2-2	0.0505	0.31	0.697693	13.8157
		2-3	0.0507	0.331	0.73893	14.5746
	5	3-1	0.0509	1.282	2.60638	51.2059
		3-2	0.0507	1.265	2.573	50.7495
		3-3	0.0503	1.278	2.59853	51.6606
	6	4-1	0.0499	1.361	2.76151	55.3409
		4-2	0.0499	1.35	2.73991	54.908
		4-3	0.05	1.375	2.789	55.7801
	7	5-1	0.0495	1.433	2.9029	58.6444
		5-2	0.0498	1.429	2.89504	58.1334
		5-3	0.05	1.461	2.95788	59.1576
	8	6-1	0.0504	1.465	2.96573	58.8439
		6-2	0.05	1.443	2.92253	58.4507
		6-3	0.0502	1.469	2.97359	59.2348
	9	7-1	0.0508	1.553	3.13854	61.7822
		7-2	0.0501	1.518	3.06981	61.2736
		7-3	0.0502	1.547	3.12676	62.286
	10	8-1	0.05	1.415	2.86755	57.351
		8-2	0.05	1.405	2.84791	56.9583
		8-3	0.05	1.425	2.88719	57.7437
	11	9-1	0.0513	1.409	2.85577	55.668
		9-2	0.0507	1.384	2.80668	55.3585
		9-3	0.051	1.411	2.8597	56.0725
