# Supplementary material for: Optimization of polysaccharide conditions and analysis of antioxidant capacity in the co-culture of Sanghuangporus vaninii and Pleurotus sapidus
Source: PeerJ. 2024 Jun 24;12:e17571. doi: 10.7717/peerj.17571 (PMC11210461; doi:10.7717/peerj.17571)
Supplement: Supplemental Information 16 [file peerj-12-17571-s016.xlsx]

## Sheet: Biomass
	Test No.		Petri dish weight(g)	Total weight(g)	Biomass (g/100mL)
	0.2	1-1	39.9077	40.7739	0.8662
		1-2	35.5106	36.3637	0.8531
		1-3	43.9031	44.7824	0.8793
	0.3	2-1	40.4964	41.3286	0.8322
		2-2	36.8836	37.7069	0.8233
		2-3	38.3371	39.1804	0.8433
	0.4	3-1	39.3463	40.2026	0.8563
		3-2	42.0693	42.9193	0.85
		3-3	35.2261	36.0887	0.8626
	0.5	4-1	42.7833	43.5985	0.8152
		4-2	39.0046	39.8146	0.81
		4-3	46.1158	46.9362	0.8204
	0.6	5-1	47.0143	47.76	0.7457
		5-2	29.0938	29.8338	0.74
		5-3	36.7791	37.5305	0.7514
	0.7	6-1	43.2451	43.9094	0.6643
		6-2	41.6032	42.2552	0.652
		6-3	45.2283	45.9017	0.6734
	0.8	7-1	47.6899	48.1944	0.5045
		7-2	44.6689	45.1634	0.4945
		7-3	41.3362	41.8507	0.5145

## Sheet: Polysaccharide content
	Test No.		Sample weights(g)	OD	Mass(mg)	Polysaccharide content (mg/g)
	0.2	1-1	0.0495	1.466	2.9677	59.9535
		1-2	0.05	1.465	2.96573	59.3147
		1-3	0.0498	1.491	3.01679	60.5781
	0.3	2-1	0.0516	1.67	3.36829	65.2769
		2-2	0.0511	1.643	3.31527	64.878
		2-3	0.051	1.66	3.34865	65.6598
	0.4	3-1	0.0501	1.391	2.82042	56.2959
		3-2	0.05	1.377	2.79293	55.8586
		3-3	0.0501	1.4	2.8381	56.6486
	0.5	4-1	0.0503	1.529	3.09141	61.4594
		4-2	0.0501	1.514	3.06195	61.1168
		4-3	0.0503	1.54	3.11301	61.8889
	0.6	5-1	0.0501	1.59	3.21119	64.0957
		5-2	0.0501	1.58	3.19156	63.7037
		5-3	0.0501	1.6	3.23083	64.4876
	0.7	6-1	0.0495	1.607	3.24458	65.547
		6-2	0.0499	1.611	3.25243	65.179
		6-3	0.05	1.636	3.30152	66.0304
	0.8	7-1	0.0504	1.127	2.30201	45.6749
		7-2	0.0504	1.117	2.28238	45.2852
		7-3	0.0504	1.137	2.32165	46.0645
