# Supplementary material for: Optimization of polysaccharide conditions and analysis of antioxidant capacity in the co-culture of Sanghuangporus vaninii and Pleurotus sapidus
Source: PeerJ. 2024 Jun 24;12:e17571. doi: 10.7717/peerj.17571 (PMC11210461; doi:10.7717/peerj.17571)
Supplement: Supplemental Information 17 [file peerj-12-17571-s017.xlsx]

## Sheet: Biomass
	Test No.		Petri dish weight(g)	Total weight(g)	Biomass (g/100mL)
	50mL	1-1	38.6683	39.0087	0.6808
		1-2	37.3362	37.6545	0.6366
		1-3	43.9903	44.3129	0.6452
	75mL	2-1	34.1065	34.6626	0.741467
		2-2	29.5582	30.1079	0.732933
		2-3	32.5381	33.1006	0.75
	100mL	3-1	32.7113	33.4983	0.787
		3-2	27.7093	28.4863	0.777
		3-3	36.7428	37.5398	0.797
	125mL	4-1	37.3896	38.4517	0.84968
		4-2	35.7328	36.7828	0.84
		4-3	40.0942	41.168	0.85904
	150mL	5-1	44.1229	45.4332	0.873533
		5-2	42.6902	43.9912	0.867333
		5-3	37.8429	39.1629	0.88
	175mL	6-1	42.7557	43.9951	0.708229
		6-2	45.9683	47.1814	0.6932
		6-3	41.5792	42.8462	0.724
	200mL	7-1	40.4888	41.6562	0.5837
		7-2	41.5839	42.7337	0.5749
		7-3	43.6894	44.8694	0.59

## Sheet: Polysaccharide content
	Test No.		Sample weights(g)	OD	Mass(mg)	Polysaccharide content (mg/g)
	50mL	1-1	0.0509	1.249	2.54158	49.9328
		1-2	0.0502	1.22	2.48463	49.4947
		1-3	0.05	1.241	2.52587	50.5174
	75mL	2-1	0.0504	1.457	2.95002	58.5322
		2-2	0.0501	1.436	2.90879	58.0596
		2-3	0.0499	1.456	2.94806	59.0794
	100mL	3-1	0.051	1.533	3.09926	60.7699
		3-2	0.0504	1.505	3.04428	60.4024
		3-3	0.0506	1.53	3.09337	61.1338
	125mL	4-1	0.0502	1.472	2.97948	59.3522
		4-2	0.05	1.453	2.94217	58.8434
		4-3	0.0501	1.487	3.00893	60.0586
	150mL	5-1	0.0506	1.373	2.78508	55.041
		5-2	0.0503	1.352	2.74384	54.5495
		5-3	0.0507	1.393	2.82435	55.7071
	175mL	6-1	0.0509	1.373	2.78508	54.7166
		6-2	0.0503	1.343	2.72617	54.1981
		6-3	0.051	1.394	2.82631	55.4179
	200mL	7-1	0.0501	1.342	2.7242	54.3753
		7-2	0.05	1.332	2.70457	54.0913
		7-3	0.0501	1.348	2.73598	54.6105
