# Supplementary material for: Optimization of polysaccharide conditions and analysis of antioxidant capacity in the co-culture of Sanghuangporus vaninii and Pleurotus sapidus
Source: PeerJ. 2024 Jun 24;12:e17571. doi: 10.7717/peerj.17571 (PMC11210461; doi:10.7717/peerj.17571)
Supplement: Supplemental Information 18 [file peerj-12-17571-s018.xlsx]

## Sheet: Biomass
	Test No.		Petri dish weight(g)	Total weight(g)	Biomass (g/100mL)
	0.05	1-1	34.7409	35.539	0.7981
		1-2	29.3358	30.1258	0.79
		1-3	40.0503	40.8563	0.806
	0.1	2-1	40.2765	41.1058	0.8293
		2-2	43.9402	44.7602	0.82
		2-3	46.7725	47.6125	0.84
	0.15	3-1	39.34	40.1775	0.8375
		3-2	33.0093	33.8393	0.83
		3-3	36.7737	37.6197	0.846
	0.2	4-1	25.9441	26.7348	0.7907
		4-2	29.0692	29.8492	0.78
		4-3	38.0063	38.8063	0.8
	0.25	5-1	41.8239	42.6032	0.7793
		5-2	45.6318	46.4018	0.77
		5-3	36.0793	36.8693	0.79
	0.3	6-1	45.2727	45.9848	0.7121
		6-2	43.7321	44.4371	0.705
		6-3	39.0954	39.8154	0.72
	0.35	7-1	35.7091	36.4366	0.7275
		7-2	47.0732	47.7932	0.72
		7-3	39.8893	40.6243	0.735

## Sheet: Polysaccharide content
	Test No.		Sample weights(g)	OD	Mass(mg)	Polysaccharide content (mg/g)
	0.05	1-1	0.0499	1.502	3.03839	60.8896
		1-2	0.05	1.493	3.02072	60.4143
		1-3	0.05	1.513	3.05999	61.1998
	0.1	2-1	0.0497	1.52	3.07374	61.8458
		2-2	0.05	1.519	3.07177	61.4354
		2-3	0.0499	1.537	3.10712	62.2669
	0.15	3-1	0.0506	1.432	2.90093	57.3307
		3-2	0.0502	1.409	2.85577	56.8878
		3-3	0.05	1.422	2.8813	57.6259
	0.2	4-1	0.0506	1.523	3.07963	60.8622
		4-2	0.0505	1.508	3.05017	60.3994
		4-3	0.0507	1.537	3.10712	61.2844
	0.25	5-1	0.0501	1.143	2.33343	46.5755
		5-2	0.0501	1.133	2.31379	46.1835
		5-3	0.0501	1.157	2.36092	47.1242
	0.3	6-1	0.0509	1.099	2.24703	44.146
		6-2	0.0504	1.069	2.18812	43.4151
		6-3	0.0501	1.092	2.23328	44.5765
	0.35	7-1	0.0511	1.202	2.44929	47.9313
		7-2	0.0503	1.171	2.38841	47.4834
		7-3	0.0505	1.205	2.45518	48.6174
