# Supplementary material for: Optimization of polysaccharide conditions and analysis of antioxidant capacity in the co-culture of Sanghuangporus vaninii and Pleurotus sapidus
Source: PeerJ. 2024 Jun 24;12:e17571. doi: 10.7717/peerj.17571 (PMC11210461; doi:10.7717/peerj.17571)
Supplement: Supplemental Information 19 [file peerj-12-17571-s019.xlsx]

## Sheet: ST
	Test No.		A1	A2	A0	scavenging rate (%)
	0.02 mg/mL	1-1	0.586	0.005	0.602	3.48837
		1-2	0.58	0.005	0.602	4.48505
		1-3	0.588	0.005	0.602	3.15615
	0.04 mg/mL	2-1	0.539	0.011	0.602	12.2924
		2-2	0.534	0.011	0.602	13.1229
		2-3	0.542	0.011	0.602	11.794
	0.06 mg/mL	3-1	0.509	0.016	0.602	18.1063
		3-2	0.511	0.016	0.602	17.7741
		3-3	0.506	0.016	0.602	18.6047
	0.08 mg/mL	4-1	0.488	0.021	0.602	22.4252
		4-2	0.485	0.021	0.602	22.9236
		4-3	0.482	0.021	0.602	23.4219
	0.1 mg/mL	5-1	0.454	0.025	0.602	28.7375
		5-2	0.45	0.025	0.602	29.402
		5-3	0.46	0.025	0.602	27.7409
	0.2 mg/mL	6-1	0.337	0.049	0.602	52.1595
		6-2	0.334	0.049	0.602	52.6578
		6-3	0.342	0.049	0.602	51.3289
	0.4 mg/mL	7-1	0.18	0.102	0.602	87.0432
		7-2	0.176	0.102	0.602	87.7076
		7-3	0.183	0.102	0.602	86.5449
	0.6 mg/mL	8-1	0.221	0.141	0.602	86.711
		8-2	0.217	0.141	0.602	87.3754
		8-3	0.212	0.141	0.602	88.206
	0.8 mg/mL	9-1	0.263	0.184	0.602	86.8771
		9-2	0.258	0.184	0.602	87.7076
		9-3	0.254	0.184	0.602	88.3721
	1 mg/mL	10-1	0.318	0.244	0.602	87.7076
		10-2	0.314	0.244	0.602	88.3721
		10-3	0.322	0.244	0.602	87.0432

## Sheet: BLZ
	Test No.		A1	A2	A0	scavenging rate (%)
	0.02 mg/mL	1-1	0.567	0.003	0.602	6.31229
		1-2	0.57	0.003	0.602	5.81395
		1-3	0.565	0.003	0.602	6.64452
	0.04 mg/mL	2-1	0.536	0.007	0.602	12.1262
		2-2	0.532	0.007	0.602	12.7907
		2-3	0.538	0.007	0.602	11.794
	0.06 mg/mL	3-1	0.519	0.011	0.602	15.6146
		3-2	0.524	0.011	0.602	14.7841
		3-3	0.516	0.011	0.602	16.113
	0.08 mg/mL	4-1	0.493	0.015	0.602	20.598
		4-2	0.501	0.015	0.602	19.2691
		4-3	0.496	0.015	0.602	20.0997
	0.1 mg/mL	5-1	0.479	0.018	0.602	23.4219
		5-2	0.472	0.018	0.602	24.5847
		5-3	0.481	0.018	0.602	23.0897
	0.2 mg/mL	6-1	0.401	0.035	0.602	39.2027
		6-2	0.395	0.035	0.602	40.1993
		6-3	0.405	0.035	0.602	38.5382
	0.4 mg/mL	7-1	0.243	0.07	0.602	71.2625
		7-2	0.24	0.07	0.602	71.7608
		7-3	0.245	0.07	0.602	70.9302
	0.6 mg/mL	8-1	0.194	0.104	0.602	85.0498
		8-2	0.191	0.104	0.602	85.5482
		8-3	0.198	0.104	0.602	84.3854
	0.8 mg/mL	9-1	0.231	0.144	0.602	85.5482
		9-2	0.235	0.144	0.602	84.8837
		9-3	0.232	0.144	0.602	85.3821
	1 mg/mL	10-1	0.27	0.18	0.602	85.0498
		10-2	0.268	0.18	0.602	85.3821
		10-3	0.264	0.18	0.602	86.0465

## Sheet: ST and BLZ co-culture
	Test No.		A1	A2	A0	scavenging rate (%)
	0.02 mg/mL	1-1	0.564	0.005	0.602	7.14286
		1-2	0.561	0.005	0.602	7.6412
		1-3	0.566	0.005	0.602	6.81063
	0.04 mg/mL	2-1	0.515	0.009	0.602	15.9468
		2-2	0.512	0.009	0.602	16.4452
		2-3	0.518	0.009	0.602	15.4485
	0.06 mg/mL	3-1	0.489	0.016	0.602	21.4286
		3-2	0.495	0.016	0.602	20.4319
		3-3	0.486	0.016	0.602	21.9269
	0.08 mg/mL	4-1	0.459	0.02	0.602	27.0764
		4-2	0.454	0.02	0.602	27.907
		4-3	0.462	0.02	0.602	26.5781
	0.1 mg/mL	5-1	0.438	0.025	0.602	31.3953
		5-2	0.432	0.025	0.602	32.392
		5-3	0.443	0.025	0.602	30.5648
	0.2 mg/mL	6-1	0.311	0.052	0.602	56.9767
		6-2	0.305	0.052	0.602	57.9734
		6-3	0.316	0.052	0.602	56.1462
	0.4 mg/mL	7-1	0.222	0.103	0.602	80.2326
		7-2	0.216	0.103	0.602	81.2292
		7-3	0.228	0.103	0.602	79.2359
	0.6 mg/mL	8-1	0.276	0.157	0.602	80.2326
		8-2	0.265	0.157	0.602	82.0598
		8-3	0.272	0.157	0.602	80.897
	0.8 mg/mL	9-1	0.325	0.208	0.602	80.5648
		9-2	0.319	0.208	0.602	81.5615
		9-3	0.314	0.208	0.602	82.392
	1 mg/mL	10-1	0.368	0.252	0.602	80.7309
		10-2	0.356	0.252	0.602	82.7243
		10-3	0.361	0.252	0.602	81.8937
