# Supplementary material for: Optimization of polysaccharide conditions and analysis of antioxidant capacity in the co-culture of Sanghuangporus vaninii and Pleurotus sapidus
Source: PeerJ. 2024 Jun 24;12:e17571. doi: 10.7717/peerj.17571 (PMC11210461; doi:10.7717/peerj.17571)
Supplement: Supplemental Information 20 [file peerj-12-17571-s020.xlsx]

## Sheet: ST
	Test No.		A	A0	scavenging rate (%)
	0.02 mg/mL	1-1	0.521	0.7	25.5714
		1-2	0.518	0.7	26
		1-3	0.523	0.7	25.2857
	0.04 mg/mL	2-1	0.494	0.7	29.4286
		2-2	0.491	0.7	29.8571
		2-3	0.496	0.7	29.1429
	0.06 mg/mL	3-1	0.466	0.7	33.4286
		3-2	0.463	0.7	33.8571
		3-3	0.467	0.7	33.2857
	0.08 mg/mL	4-1	0.427	0.7	39
		4-2	0.425	0.7	39.2857
		4-3	0.43	0.7	38.5714
	0.1 mg/mL	5-1	0.403	0.7	42.4286
		5-2	0.4	0.7	42.8571
		5-3	0.405	0.7	42.1429
	0.2 mg/mL	6-1	0.277	0.7	60.4286
		6-2	0.276	0.7	60.5714
		6-3	0.279	0.7	60.1429
	0.4 mg/mL	7-1	0.1	0.7	85.7143
		7-2	0.104	0.7	85.1429
		7-3	0.097	0.7	86.1429
	0.6 mg/mL	8-1	0.021	0.7	97
		8-2	0.023	0.7	96.7143
		8-3	0.019	0.7	97.2857
	0.8 mg/mL	9-1	0.015	0.7	97.8571
		9-2	0.014	0.7	98
		9-3	0.016	0.7	97.7143
	1 mg/mL	10-1	0.012	0.7	98.2857
		10-2	0.013	0.7	98.1429
		10-3	0.011	0.7	98.4286

## Sheet: BLZ
	Test No.		A	A0	scavenging rate (%)
	0.02 mg/mL	1-1	0.526	0.7	24.8571
		1-2	0.522	0.7	25.4286
		1-3	0.53	0.7	24.2857
	0.04 mg/mL	2-1	0.5	0.7	28.5714
		2-2	0.503	0.7	28.1429
		2-3	0.496	0.7	29.1429
	0.06 mg/mL	3-1	0.471	0.7	32.7143
		3-2	0.473	0.7	32.4286
		3-3	0.468	0.7	33.1429
	0.08 mg/mL	4-1	0.442	0.7	36.8571
		4-2	0.445	0.7	36.4286
		4-3	0.44	0.7	37.1429
	0.1 mg/mL	5-1	0.403	0.7	42.4286
		5-2	0.4	0.7	42.8571
		5-3	0.406	0.7	42
	0.2 mg/mL	6-1	0.301	0.7	57
		6-2	0.305	0.7	56.4286
		6-3	0.297	0.7	57.5714
	0.4 mg/mL	7-1	0.14	0.7	80
		7-2	0.143	0.7	79.5714
		7-3	0.138	0.7	80.2857
	0.6 mg/mL	8-1	0.035	0.7	95
		8-2	0.032	0.7	95.4286
		8-3	0.037	0.7	94.7143
	0.8 mg/mL	9-1	0.011	0.7	98.4286
		9-2	0.01	0.7	98.5714
		9-3	0.012	0.7	98.2857
	1 mg/mL	10-1	0.009	0.7	98.7143
		10-2	0.008	0.7	98.8571
		10-3	0.009	0.7	98.7143

## Sheet: ST and BLZ co-culture
	Test No.		A	A0	scavenging rate (%)
	0.02 mg/mL	1-1	0.524	0.7	25.1429
		1-2	0.52	0.7	25.7143
		1-3	0.527	0.7	24.7143
	0.04 mg/mL	2-1	0.484	0.7	30.8571
		2-2	0.482	0.7	31.1429
		2-3	0.487	0.7	30.4286
	0.06 mg/mL	3-1	0.437	0.7	37.5714
		3-2	0.435	0.7	37.8571
		3-3	0.44	0.7	37.1429
	0.08 mg/mL	4-1	0.41	0.7	41.4286
		4-2	0.412	0.7	41.1429
		4-3	0.407	0.7	41.8571
	0.1 mg/mL	5-1	0.374	0.7	46.5714
		5-2	0.371	0.7	47
		5-3	0.376	0.7	46.2857
	0.2 mg/mL	6-1	0.229	0.7	67.2857
		6-2	0.227	0.7	67.5714
		6-3	0.231	0.7	67
	0.4 mg/mL	7-1	0.054	0.7	92.2857
		7-2	0.052	0.7	92.5714
		7-3	0.056	0.7	92
	0.6 mg/mL	8-1	0.016	0.7	97.7143
		8-2	0.015	0.7	97.8571
		8-3	0.014	0.7	98
	0.8 mg/mL	9-1	0.012	0.7	98.2857
		9-2	0.011	0.7	98.4286
		9-3	0.012	0.7	98.2857
	1 mg/mL	10-1	0.009	0.7	98.7143
		10-2	0.008	0.7	98.8571
		10-3	0.009	0.7	98.7143
